# Supplementary material for: Insights into the formation and diversification of a novel chiropteran wing membrane from embryonic development
Source: PubMed Central journal article supplement (PMC10161559; doi:10.1186/s12915-023-01598-y), 2023-05-04

Additional File 1: Figure S1. Gross morphology of 16 species of bats between Stage 14 and 16. Arrow indicates location of first appearance of plagiopatagium.

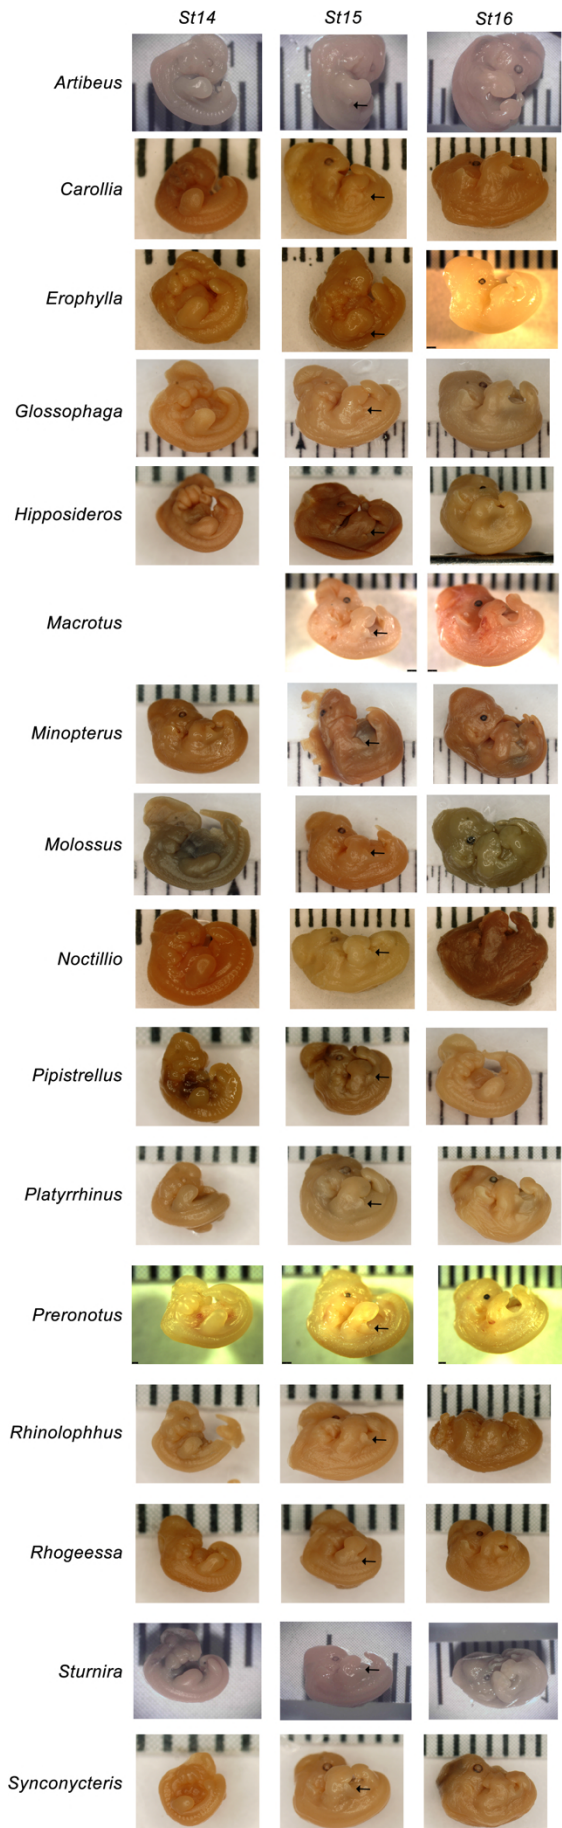

Additional File 1: Figure S2. Plagiopatagial HCR in situ hybridization for Ripk4, Tmeff2, and Klf4 for Pteronotus and Erophylla plagiopatagia at Stage 14 (Pteronotus – A, Erophylla – B) and Stage 16 (Pteronotus – C, Erophylla – D), and merged images for Stage 15 and Stage 17 (Tmeff2 = yellow, Klf4 = magenta, Ripk4 = cyan).

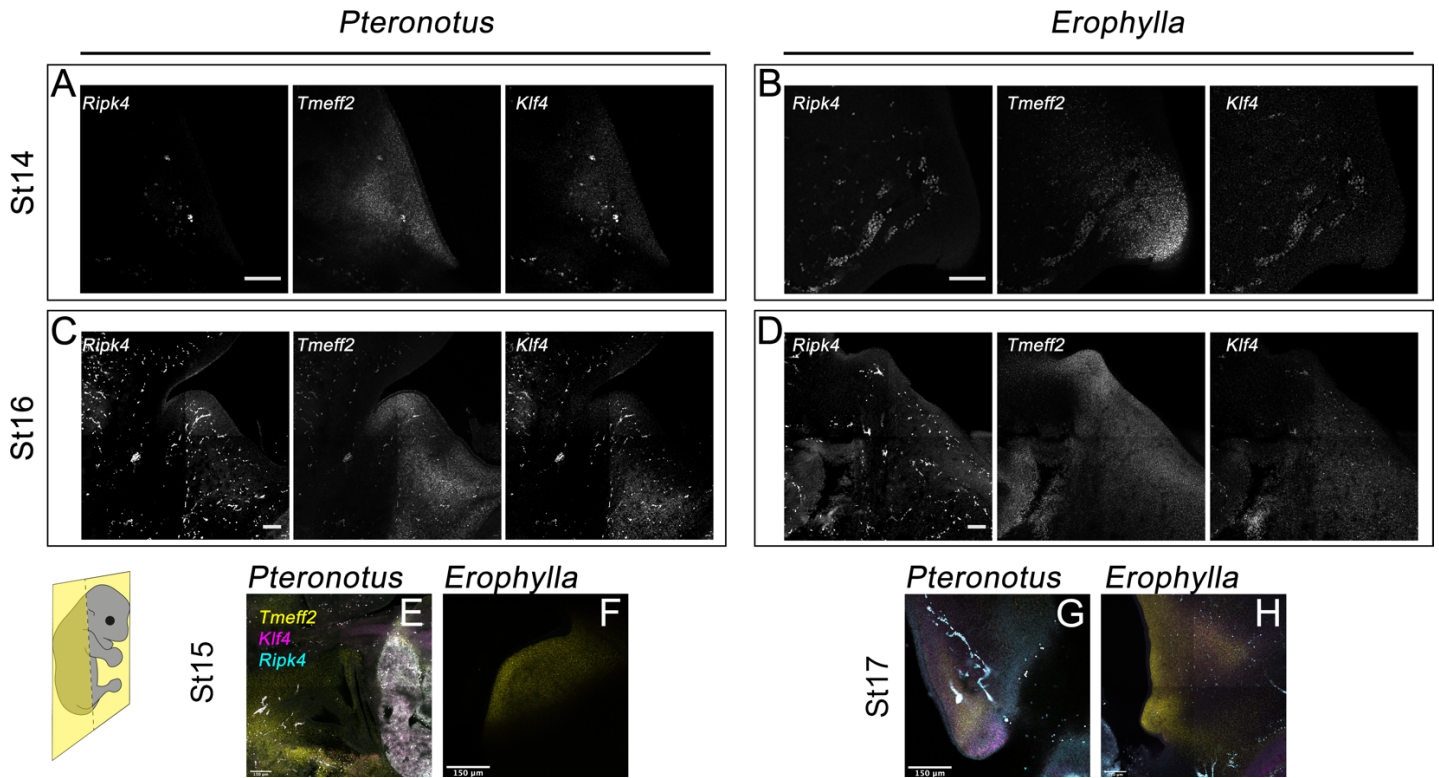

Additional File 1: Figure S3. Principal component plots of geometric morphometric analysis of the developing plagiopatagium, labeled by foraging guild.

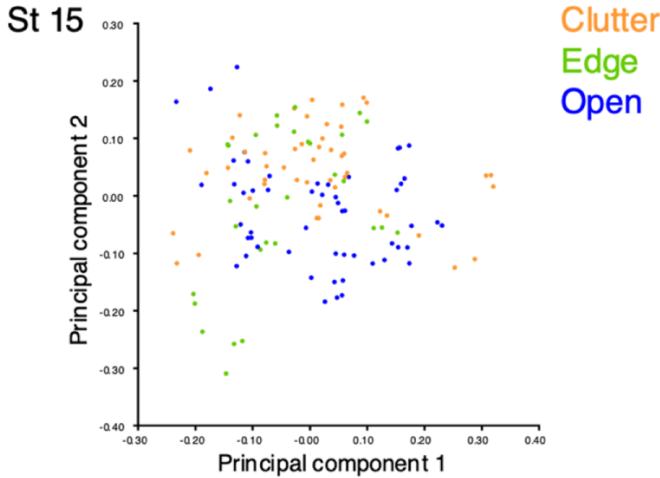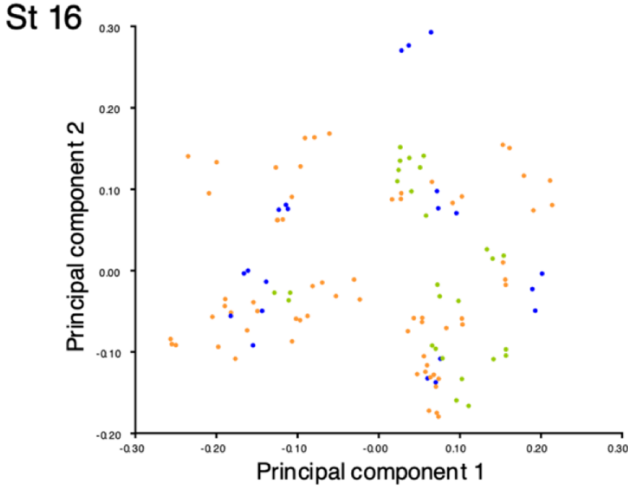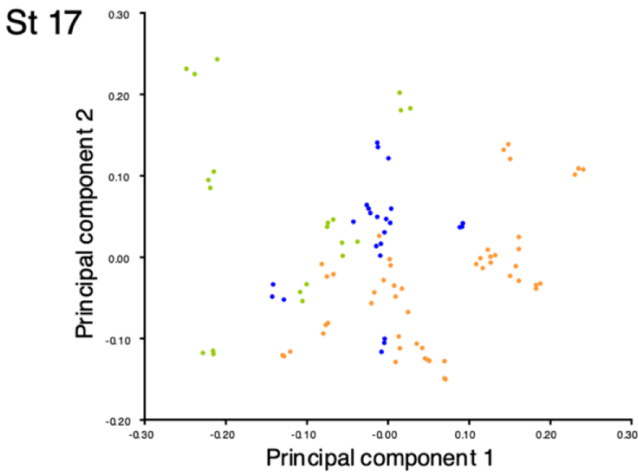

Additional File 1: Figure S4. Hematoxylin and eosin-stained sections through the plagiopatagium of eight species of bats between Stage 14 and Stage 17.

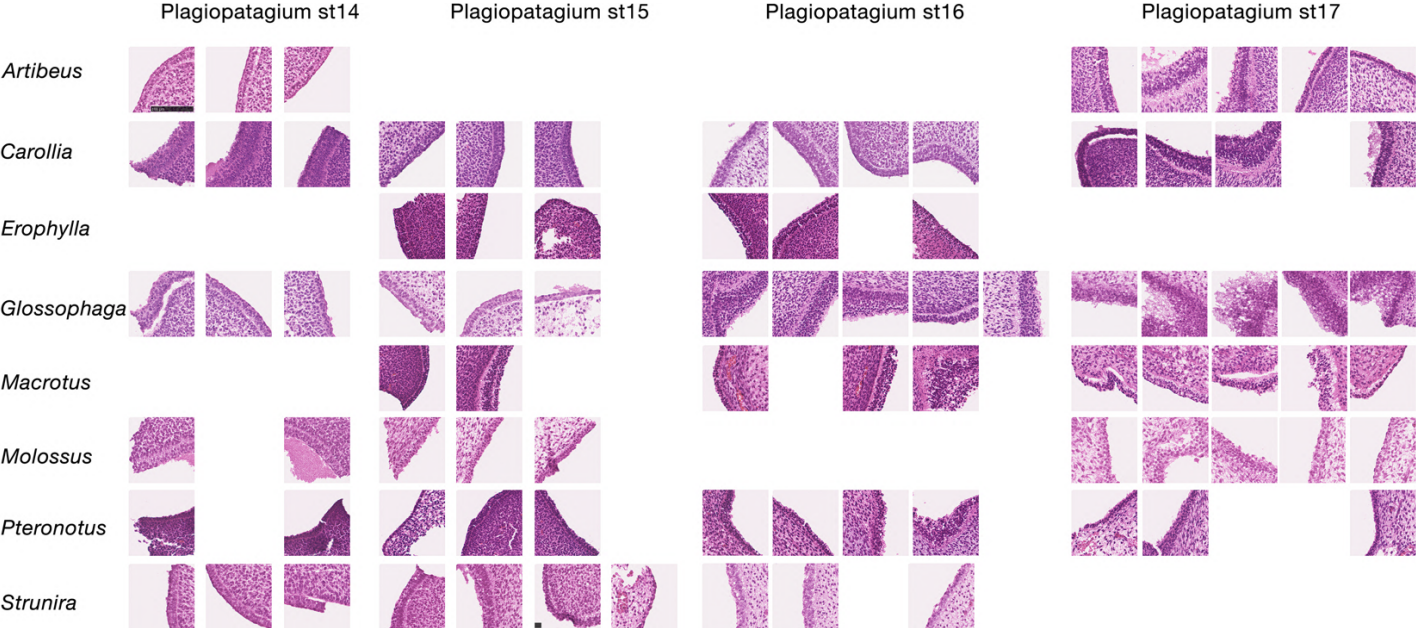

Supplement: 12915_2023_1598_MOESM1_ESM.pdf [file 12915_2023_1598_MOESM1_ESM.pdf]
